# Supplementary material
Source: publisher figshare collection journal article supplement (https://gsajournals.figshare.com/ndownloader/files/17502323)
Supplement: Supplementary file 1 [file 17502323]

**FILE S1 | M1 marker sequence.** The primer combination, genome coordinates on *S. pennellii* and FASTA sequence for marker M1 on chromosome 11 is shown. The Standard Nucleotide BLAST was used on the NCBI website (<https://blast.ncbi.nlm.nih.gov>) with default parameters.

M1 Primers 91R31-M42

S. pennellii coordinates: 1232059-1232137 bp

>Marker M1 sequence

TAAAGTAGAGTAAAATCTGTACGCCAAAACAGTAAAGGCGGCAGTGGAAGTAGAGTAAGCTAGAACTCCTCTTTTTACTATTTTCCTCAATTGTACTTTTTTCTGGTGAGGAGGGAGTTGTTGCTAGTTCTGCA
